# Supplementary material for: A Structural Comparison of SARS-CoV-2 Main Protease and Animal Coronaviral Main Protease Reveals Species-Specific Ligand Binding and Dimerization Mechanism
Source: MDPI journal article supplement (doi:10.3390/ijms23105669), 2022-05-18
Supplement: s1 [file s1]

## Supplementary materials

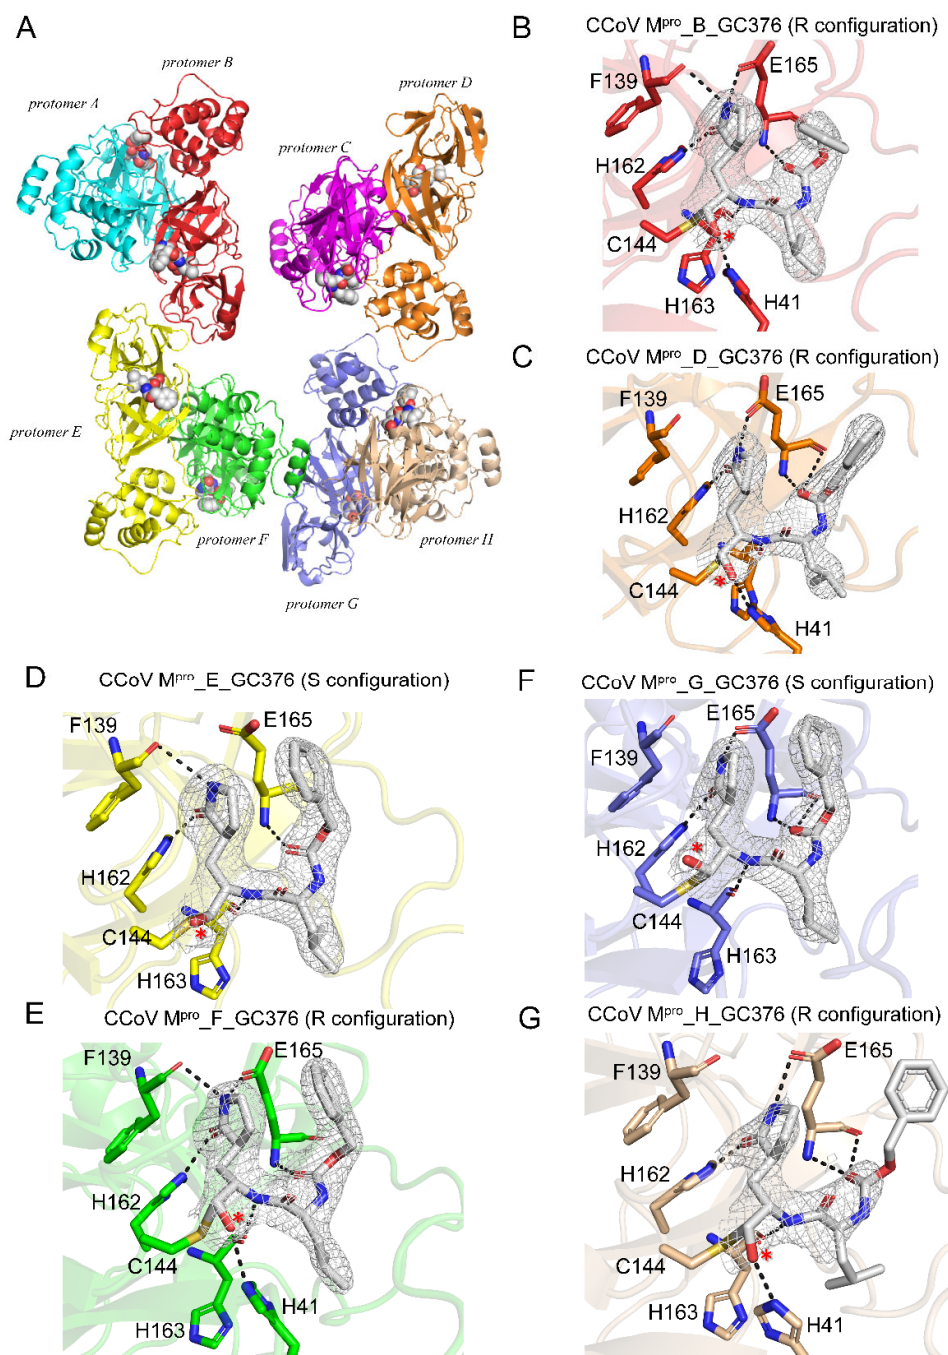

**Figure S1.** The differences between protomers of CCoV M<sup>pro</sup> in the same asymmetric unit. (A) The overview of the asymmetric unit of CCoV M<sup>pro</sup> complexed with GC376 solved in this study. GC376s are shown in white spheres. (B-G) The enlarged views of the substrate-binding pocket from (B) protomer B (red), (C) protomer D (orange), (D) protomer E (yellow), (E) protomer F (green), (F) protomer G (slate) and (G) protomer H (wheat) of CCoV M<sup>pro</sup>\_GC376 complex. The structures are presented in the same way as Figure 3B-3E. The 2Fo-Fc electron density map of GC376s contoured at 1.0  $\sigma$  are shown in grey meshes.

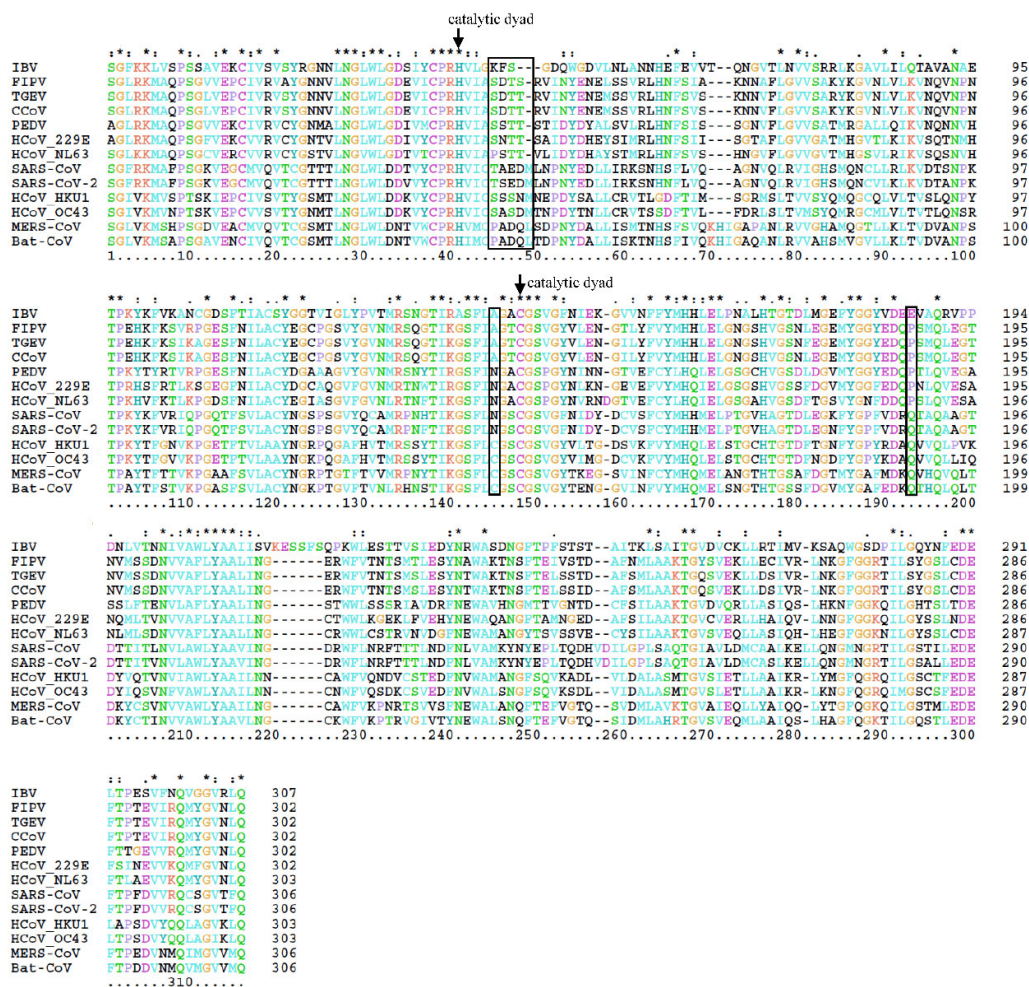

**Figure S2.** Multiple sequence alignment of animal and human CoV M<sup>pro</sup>s. The conserved catalytic dyad (Cys-His) among all CoV M<sup>pro</sup>s is indicated by arrows. The three structural features shown in Figure 4 are highlighted by black rectangles. HCoV\_229E M<sup>pro</sup> (GenBank: AGW80947.1, a.a. 2966-3267); HCoV\_NL63 M<sup>pro</sup> (UniProtKB: P0C6U6.1, a.a. 2942-3238); HCoV\_HKU1 M<sup>pro</sup> (UniProtKB: P0C6U3.1, a.a. 3338-3631); HCoV\_OC43 M<sup>pro</sup> (GenBank: AGT51636.1, a.a. 3247 to 3549); MERS-CoV M<sup>pro</sup> (GenBank: QLD98008.1, a.a. 3248 to 3553); SARS-CoV M<sup>pro</sup> (GenBank: AFR58684.1, a.a. 3241-3546); SARS-CoV-2 M<sup>pro</sup> (UniProtKB: P0DTD1, a.a. 3264-3569); Bat-CoV HKU4 M<sup>pro</sup> (UniProtKB: P0C6F7.1, a.a. 3299-3604); FIPV M<sup>pro</sup> (UniProtKB: Q98VG9.2, a.a. 2904-3205); CCoV M<sup>pro</sup> (UniProtKB: P0C6F7.1, a.a. 3299-3604); TGEV M<sup>pro</sup> (GenBank: AMB66486.1, a.a. 2879-3180); PEDV M<sup>pro</sup> (UniProtKB: P0C6V6.1, a.a. 2998-3299).

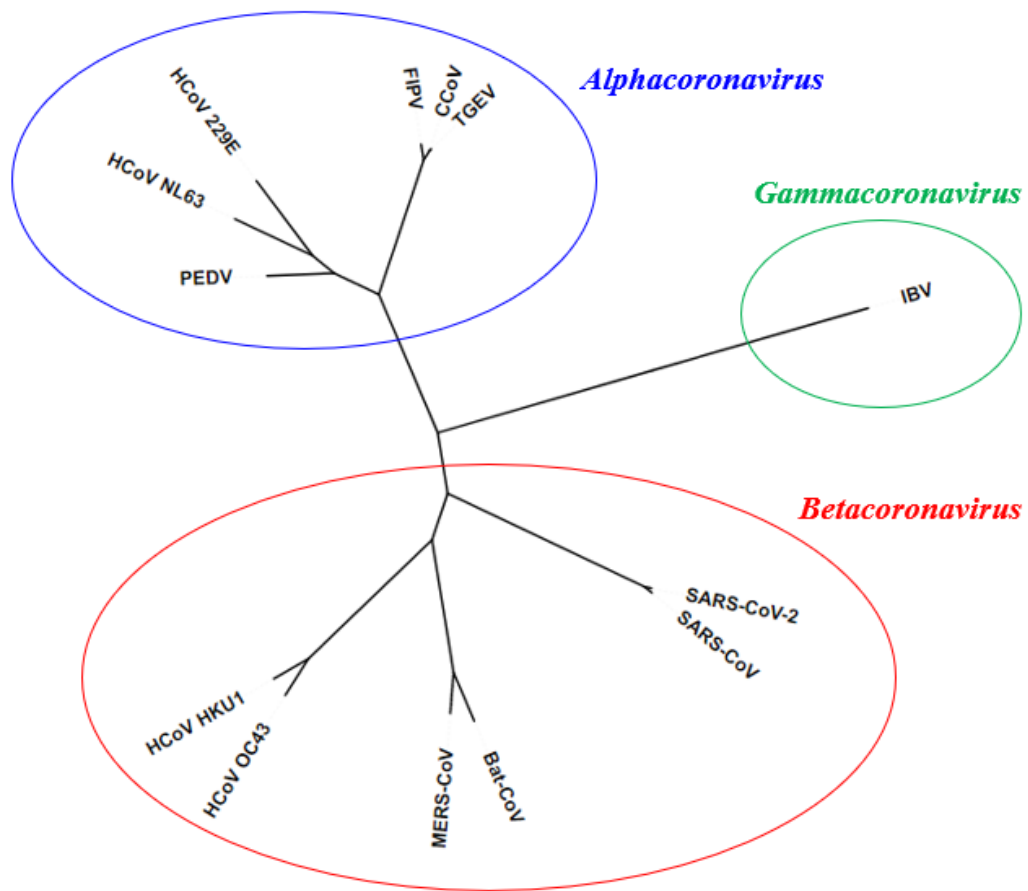

**Figure S3.** Phylogenetic tree of CoV M<sup>pro</sup>s. The source of the sequences of different CoV M<sup>pro</sup>s are identical to those shown in Figure S2. The three different genera of coronaviruses are indicated. .
